# Supplementary material
Source: PubMed Central journal article supplement (PMC9361221)
Supplement: NIHMS527303-supplement-Supplementary_materials.pdf [file NIHMS527303-supplement-Supplementary_materials.pdf]

## Acute Nicotine Differentially Impacts Anticipatory Valence- and Magnitude-Related Striatal Activity

### Supplemental Information

**Table S1.** Summary of the outcomes of analysis of Parrot mood questionnaire ratings: Controls vs. Smokers. Mean difference = pre-rating – post-rating.

| Measure                          | Smokers<br>(mean difference; SD)<br><i>n</i> = 28 |                    | Controls<br>(mean difference; SD)<br><i>n</i> = 28 |                    | Contrasts                           |                                    |                                      |                                                                                                                        |
|----------------------------------|---------------------------------------------------|--------------------|----------------------------------------------------|--------------------|-------------------------------------|------------------------------------|--------------------------------------|------------------------------------------------------------------------------------------------------------------------|
|                                  | Session 1                                         | Session 2          | Session 1                                          | Session 2          | Group                               | Session                            | Time                                 | Interactions                                                                                                           |
| Parrot 1: Relaxed/Tense          | 40.43<br>(298.67)                                 | 35.00<br>(278.78)  | -68.85<br>(326.74)                                 | -35.57<br>(151.54) | $F_{(1, 54)} = 7.39$<br>$p = 0.009$ | $F_{(1, 54)} = 5.50$<br>$p = 0.02$ | NS                                   | NS                                                                                                                     |
| Parrot 2: Calm/Nervous           | 19.71<br>(146.46)                                 | 12.71<br>(165.30)  | -40.14<br>(310.38)                                 | -35.86<br>(75.33)  | NS                                  | $F_{(1, 54)} = 5.35$<br>$p = 0.02$ | NS                                   | NS                                                                                                                     |
| Parrot 3: Tired/Energetic        | -46.43<br>(127.32)                                | -47.43<br>(137.19) | -147.71<br>(207.46)                                | -28.14<br>(128.53) | NS                                  | NS                                 | $F_{(1, 54)} = 17.29$<br>$p < 0.001$ | Session x Time:<br>$F_{(1, 54)} = 5.52$<br>$p = 0.02$<br>Session x Time x Group:<br>$F_{(1, 54)} = 5.70$<br>$p = 0.02$ |
| Parrot 4: Drowsy/Alert           | -77.29<br>(193.51)                                | -54.00<br>(182.55) | -76.14<br>(138.92)                                 | -22.86<br>(133.19) | $F_{(1, 54)} = 4.49$<br>$p = 0.04$  | NS                                 | $F_{(1, 54)} = 13.14$<br>$p = 0.001$ | NS                                                                                                                     |
| Parrot 5: Irritated/Contented    | -70.57<br>(183.15)                                | -81.86<br>(174.14) | 37.29<br>(122.98)                                  | -34.57<br>(127.26) | NS                                  | NS                                 | $F_{(1, 54)} = 6.79$<br>$p = 0.01$   | Time x Group:<br>$F_{(1, 54)} = 7.29$<br>$p = 0.009$                                                                   |
| Parrot 6: Dissatisfied/Satisfied | -53.71<br>(107.09)                                | -57.86<br>(117.15) | -8.28<br>(69.08)                                   | 17.43<br>(115.75)  | NS                                  | NS                                 | $F_{(1, 54)} = 6.26$<br>$p = 0.01$   | Time x Group:<br>$F_{(1, 54)} = 8.69$<br>$p = 0.005$                                                                   |
| Parrot 7: Distracted/Focused     | -107.14<br>(155.13)                               | -90.43<br>(152.31) | -27.71<br>(111.53)                                 | -28.43<br>(130.15) | NS                                  | NS                                 | $F_{(1, 54)} = 23.10$<br>$p < 0.001$ | Time x Group:<br>$F_{(1, 54)} = 7.18$<br>$p = 0.01$                                                                    |
| Parrot 8: Depressed/Happy        | -16.00<br>(77.03)                                 | -43.43<br>(132.47) | 28.14<br>(95.84)                                   | -13.43<br>(69.24)  | NS                                  | NS                                 | NS                                   | Time x Group:<br>$F_{(1, 54)} = 4.25$<br>$p = 0.04$                                                                    |
| Parrot 9: Satiated/Hungry        | 59.57<br>(143.85)                                 | 56.29<br>(103.68)  | 74.14<br>(119.59)                                  | 62.71<br>(171.42)  | NS                                  | NS                                 | $F_{(1, 54)} = 22.76$<br>$p < 0.001$ | NS                                                                                                                     |

NS, not significant.

**Table S2.** Summary of analysis of mood ratings (Parrot and TCQ ) – Smokers only: Nicotine vs. Placebo. Mean difference = pre-rating – post-rating.

| Measure                             | Nicotine<br>(mean difference; SD) | Placebo<br>(mean difference; SD) | Contrasts                           |                                     |              |
|-------------------------------------|-----------------------------------|----------------------------------|-------------------------------------|-------------------------------------|--------------|
|                                     |                                   |                                  | Drug Condition                      | Time                                | Interactions |
| TCQ: Emotionality                   | -61.90<br>(198.71)                | -87.13<br>(166.43)               | NS                                  | $F_{(1,27)} = 5.59$<br>$p = 0.02$   | NS           |
| TCQ: Expectancy                     | -60.24<br>(138.25)                | -53.90<br>(173.19)               | $F_{(1,27)} = 10.49$<br>$p = 0.003$ | $F_{(1,27)} = 5.36$<br>$p = 0.03$   | NS           |
| TCQ: Compulsivity                   | -44.37<br>(160.24)                | -49.13<br>(147.73)               | NS                                  | NS                                  | NS           |
| TCQ: Purposefulness                 | -47.56<br>(166.83)                | -60.21<br>(141.07)               | $F_{(1,27)} = 11.21$<br>$p = 0.002$ | $F_{(1,27)} = 5.00$<br>$p = 0.03$   | NS           |
| Parrot 1: Relaxed/Tense             | 44.14<br>(270.56)                 | 31.29<br>(306.02)                | $F_{(1,27)} = 14.08$<br>$p = 0.001$ | NS                                  | NS           |
| Parrot 2: Calm/Nervous              | 24.43<br>(147.35)                 | 8.00<br>(164.16)                 | $F_{(1,27)} = 5.99$<br>$p = 0.03$   | NS                                  | NS           |
| Parrot 3:<br>Tired/Energetic        | -29.86<br>(113.14)                | -64.00<br>(147.07)               | NS                                  | $F_{(1,27)} = 5.62$<br>$p = 0.03$   | NS           |
| Parrot 4: Drowsy/Alert              | -25.57<br>(179.40)                | -105.71<br>(188.50)              | NS                                  | $F_{(1,27)} = 7.32$<br>$p = 0.01$   | NS           |
| Parrot 5:<br>Irritated/Contented    | -55.29<br>(155.72)                | -97.14<br>(196.92)               | $F_{(1,27)} = 9.08$<br>$p = 0.006$  | $F_{(1,27)} = 9.70$<br>$p = 0.004$  | NS           |
| Parrot 6:<br>Dissatisfied/Satisfied | -62.14<br>(102.26)                | -49.43<br>(121.08)               | NS                                  | $F_{(1,27)} = 14.14$<br>$p = 0.001$ | NS           |
| Parrot 7:<br>Distracted/Focused     | -85.00<br>(111.75)                | -112.57<br>(185.81)              | $F_{(1,27)} = 6.87$<br>$p = 0.01$   | $F_{(1,27)} = 24.26$<br>$p < 0.001$ | NS           |
| Parrot 8:<br>Depressed/Happy        | -39.00<br>(107.86)                | -20.42<br>(109.81)               | NS                                  | $F_{(1,27)} = 4.89$<br>$p = 0.04$   | NS           |
| Parrot 9:<br>Satiated/Hungry        | 74.86<br>(106.11)                 | 41.00<br>(139.98)                | NS                                  | $F_{(1,27)} = 11.05$<br>$p = 0.003$ | NS           |

NS, not significant; TCQ, Tobacco Craving Questionnaire.

**Table S3.** Summary of the analysis of characterization measures: Smokers vs. Controls.

| Measure                             | Scale/Subscale      | Smokers<br>(mean (SD)) | Controls<br>(mean (SD)) | Comparison<br>(independent <i>t</i> -test) |
|-------------------------------------|---------------------|------------------------|-------------------------|--------------------------------------------|
| Temperament and Character Inventory | Cooperativeness     | 33.72 (5.71)           | 34.91 (4.48)            | NS                                         |
|                                     | Harm avoidance      | 10.58 (6.31)           | 9.18 (5.06)             | NS                                         |
|                                     | Novelty seeking     | 18.46 (4.26)           | 19.55 (5.45)            | NS                                         |
|                                     | Reward dependence   | 14.54 (4.64)           | 16.57 (4.66)            | NS                                         |
|                                     | Persistence         | 5.04 (1.87)            | 5.61 (1.64)             | NS                                         |
|                                     | Self-directedness   | 12.20 (6.58)           | 12.73 (5.34)            | NS                                         |
|                                     | Self-transcendence  | 36.96 (5.51)           | 35.64 (4.58)            | NS                                         |
| Childhood Trauma Questionnaire      | Emotional abuse     | 8.00 (5.49)            | 5.89 (2.34)             | NS                                         |
|                                     | Physical abuse      | 6.22 (3.27)            | 5.51 (1.98)             | NS                                         |
|                                     | Sexual abuse        | 6.15 (4.55)            | 5.70 (4.05)             | NS                                         |
|                                     | Emotional neglect   | 10.29 (5.44)           | 7.74 (3.13)             | NS                                         |
|                                     | Physical neglect    | 6.51 (3.96)            | 6.04 (2.28)             | NS                                         |
|                                     | Minimization/denial | 0.29 (0.72)            | 0.51 (0.94)             | NS                                         |
| Beck Depression Inventory           | n/a                 | 2.11 (2.49)            | 1.07 (2.16)             | NS                                         |
| Beck Anxiety Inventory              | n/a                 | 1.61 (2.48)            | 0.79 (1.52)             | NS                                         |
| Trails A                            | Time                | 27.29 (8.09)           | 26.78 (9.71)            | NS                                         |
|                                     | Errors              | 0.14 (0.52)            | 0.04 (0.19)             | NS                                         |
| Trails B                            | Time                | 66.04 (29.85)          | 63.48 (29.89)           | NS                                         |
|                                     | Errors              | 0.36 (1.03)            | 0.59 (0.89)             | NS                                         |
| Weschler Memory Scale               | Spatial span        | 16.07 (2.78)           | 16.19 (3.79)            | NS                                         |
|                                     | Digit span          | 19.11 (3.74)           | 19.04 (4.16)            | NS                                         |
| Lifetime Events Questionnaire       | Last 6 months       | 1.23 (2.47)            | 1.25 (2.09)             | NS                                         |
|                                     | Lifetime            | 4.88 (5.11)            | 2.96 (4.31)             | NS                                         |
| Positive and Negative Affect Scale  | Negative affect     | 1.73 (1.66)            | 1.56 (2.29)             | NS                                         |
|                                     | Positive affect     | 15.65 (2.96)           | 16.07 (4.15)            | NS                                         |
| K10                                 | n/a                 | 3.61 (3.37)            | 3.15 (3.51)             | NS                                         |

K10, Kessler Psychological Distress Scale; n/a, not applicable; NS, not significant.

**Table S4.** Summary of the analysis of post session blood concentrations (ng/mL) of nicotine and its metabolites.

|             | <b>Nicotine (mean; SD)</b> | <b>Placebo (mean; SD)</b> | <b>Comparison</b>                 |
|-------------|----------------------------|---------------------------|-----------------------------------|
| Nicotine    | 24.1<br>(10.8)             | 3.0<br>(3.9)              | $t_{(26)} = 11.95$<br>$p < 0.001$ |
| Cotinine    | 308.1<br>(184.4)           | 235.3<br>(158.0)          | $t_{(26)} = 3.92$<br>$p = 0.001$  |
| OH-Cotinine | 94.0<br>(64.9)             | 83.7<br>(43.1)            | NS                                |
| Norcotinine | 1.4<br>(2.1)               | 0.3<br>(0.6)              | $t_{(26)} = 3.27$<br>$p = 0.003$  |

NS, not significant.

**Table S5.** Summary of behavioral outcomes on the MID-R - Smokers vs. Controls.

| <b>Measure</b>                  | <b>Smokers (mean; SD)</b><br><i>n</i> = 28 |                       | <b>Controls (mean; SD)</b><br><i>n</i> = 28 |                       | <b>Group</b>     | <b>Session</b>                       | <b>Group x Session</b> |
|---------------------------------|--------------------------------------------|-----------------------|---------------------------------------------|-----------------------|------------------|--------------------------------------|------------------------|
|                                 | <b>Session 1</b>                           | <b>Session 2</b>      | <b>Session 1</b>                            | <b>Session 2</b>      |                  |                                      |                        |
| MID-R: Final Monetary Gain (\$) | \$381.93<br>(\$73.98)                      | \$378.63<br>(\$61.02) | \$378.98<br>(\$57.85)                       | \$386.64<br>(\$62.27) | NS               | NS                                   | NS                     |
| MID-R: Reaction Time (ms)       | 276.14<br>(46.61)                          | 262.65<br>(54.54)     | 276.26<br>(48.07)                           | 267.27<br>(46.40)     | NS               | $F_{(1, 54)} = 13.09$<br>$p = 0.001$ | NS                     |
|                                 | <b>Nicotine</b>                            | <b>Placebo</b>        |                                             |                       | <b>Condition</b> |                                      |                        |
| MID-R: Final Monetary Gain (\$) | \$383.89<br>(\$66.86)                      | \$369.73<br>(\$96.76) | n/a                                         | n/a                   | NS               |                                      |                        |
| MID-R: Reaction Time (ms)       | 265.66<br>(49.40)                          | 272.82<br>(53.67)     | n/a                                         | n/a                   | NS               |                                      |                        |

MID-R, revised monetary incentive delay task; NS, not significant.

**Table S6.** Summary of valence-related changes in activity in smokers. Note: all clusters and contrasts are significant at  $p_{\text{CORRECTED}} < 0.05$ .

| Analysis                                       | Region                    | Talairach Coordinates |          |          | $K_E$ | Contrast   |
|------------------------------------------------|---------------------------|-----------------------|----------|----------|-------|------------|
|                                                |                           | <i>x</i>              | <i>y</i> | <i>z</i> |       |            |
| Valence (Prime 1) –<br>Whole brain             | R. Lingual gyrus          | 10.1                  | -73.3    | 4.6      | 1553  | Gain >Loss |
|                                                | L. Caudate                | -12.6                 | 10.1     | 0.2      | 912   | Gain >Loss |
|                                                | R. Inferior frontal gyrus | 34.1                  | 22.7     | -2.9     | 744   | Gain >Loss |
|                                                | R. Caudate                | 8.5                   | 12       | 1.8      | 695   | Gain >Loss |
|                                                | L. Middle occipital gyrus | -8.7                  | -89.7    | 14.6     | 414   | Gain >Loss |
|                                                | L. Lingual gyrus          | -10.3                 | -82.2    | 4        | 382   | Gain >Loss |
| Valence (Prime 1) –<br>Small Volume Correction | R. Caudate                | 8.4                   | 12       | 2        | 666   | Gain >Loss |
|                                                | L. Caudate                | -12.8                 | 10.3     | 0.8      | 661   | Gain >Loss |

L., left; R., right.

**Table S7.** Summary of magnitude-related changes in activity in smokers. All clusters and contrasts are significant at  $p_{\text{CORRECTED}} < 0.05$ ;

| Effect          | Region                           | Talairach Coordinates |     |     | $K_E$ | Contrast                 |
|-----------------|----------------------------------|-----------------------|-----|-----|-------|--------------------------|
|                 |                                  | x                     | y   | z   |       |                          |
| Gain Magnitude† | R. Cuneus                        | 2                     | -84 | 15  | 6032  | Low < Medium; Low < High |
|                 | L. Cingulate gyrus & BA32        | -3                    | 24  | 32  | 1973  | Low < Medium             |
|                 | L. Insula & BA13                 | -39                   | 18  | -1  | 1818  | Low < High               |
|                 | R. Insula & BA13                 | 34                    | 20  | 0   | 1535  | Low < High               |
|                 | L. Caudate                       | -1                    | 1   | 9   | 1377  | Low < High               |
|                 | L. BA19                          | -17                   | -52 | -3  | 881   | Low < High               |
|                 | L. Cerebellar tonsil             | -27                   | -55 | -30 | 721   | Low < High               |
|                 | R. Declive                       | 18                    | -69 | -16 | 552   | Low < High               |
|                 | R. Inferior frontal gyrus        | 50                    | 29  | -2  | 372   | Low < Medium             |
|                 | L. Middle frontal gyrus & BA6    | -7                    | -9  | 61  | 268   | Low < High               |
| Gain Magnitude‡ | L. Cingulate gyrus & BA32        | -3                    | 19  | 33  | 450   | Low < Medium; Low < High |
|                 | L. Putamen                       | -20                   | 9   | -3  | 416   | Low < High               |
|                 | L. Caudate                       | -11                   | 5   | 10  | 303   | Low < Medium; Low < High |
|                 | R. Caudate                       | 8                     | 3   | 10  | 205   | Low < Medium; Low < High |
|                 | R. Caudate                       | 8                     | 13  | 1   | 104   | Low < Medium; Low < High |
|                 | L. Cingulate gyrus & BA32        | -5                    | 36  | 26  | 49    | Low < Medium             |
|                 | L. Superior frontal gyrus & BA10 | -21                   | 61  | -2  | 27    | Medium < High            |
| Loss Magnitude† | R. Cuneus & BA17                 | 1                     | -85 | 8   | 1378  | Low < High               |
|                 | R. Lingual gyrus                 | 9                     | -73 | -7  | 396   | Low < High               |
|                 | R. Lingual gyrus & BA19          | 11                    | -55 | 2   | 307   | Low < High               |

BA, Brodmann area; L., left; R., right.

†whole brain.

‡small volume correction.

**Table S8.** Summary of outcome-related changes in activity in smokers. Note: all clusters and contrasts are significant at  $p_{\text{CORRECTED}} < 0.05$

| Analysis                         | Region                        | Talairach Coordinates |     |     | $K_E$ | Contrast                  |
|----------------------------------|-------------------------------|-----------------------|-----|-----|-------|---------------------------|
|                                  |                               | x                     | y   | z   |       |                           |
| Outcome – whole brain            | L. Thalamus                   | -2                    | -8  | 13  | 76156 | Successful > Unsuccessful |
|                                  | L. Precuneus & BA7            | -2                    | -36 | 46  | 5912  | Successful > Unsuccessful |
|                                  | L. Cerebellar tonsil          | -4                    | -52 | -31 | 5024  | Successful > Unsuccessful |
|                                  | L. Superior frontal gyrus     | -26                   | 18  | 50  | 3936  | Successful > Unsuccessful |
|                                  | R. Precuneus                  | 30                    | -72 | 35  | 3110  | Successful > Unsuccessful |
|                                  | R. Cerebellar tonsil          | 16                    | -36 | -36 | 2003  | Successful > Unsuccessful |
|                                  | R. Cuneus & BA18              | 16                    | -99 | 8   | 1689  | Successful > Unsuccessful |
|                                  | L. Inferior semi-lunar lobule | -3                    | -70 | -39 | 1368  | Successful > Unsuccessful |
|                                  | L. Cuneus                     | -17                   | -98 | -1  | 1174  | Successful > Unsuccessful |
|                                  | L. Fusiform gyrus & BA19      | -26                   | -83 | -11 | 976   | Successful > Unsuccessful |
|                                  | R. Superior frontal gyrus     | 21                    | 21  | 48  | 419   | Successful > Unsuccessful |
|                                  | R. Medial frontal gyrus & BA9 | 14                    | 35  | 27  | 359   | Successful > Unsuccessful |
|                                  | R. Posterior Cingulate        | 9                     | -52 | 14  | 332   | Successful > Unsuccessful |
|                                  | Outcome - SVC                 | R. Putamen            | 18  | 7   | 2     | 7459                      |
| L. Putamen                       |                               | -18                   | 8   | 1   | 5946  | Successful > Unsuccessful |
| L. Anterior cingulate & BA32     |                               | -5                    | 42  | 5   | 1718  | Successful > Unsuccessful |
| R. Anterior cingulate            |                               | 6                     | 43  | 8   | 1645  | Successful > Unsuccessful |
| R. Superior frontal gyrus & BA10 |                               | 21                    | 66  | 2   | 506   | Successful > Unsuccessful |
| R. Middle frontal gyrus & BA10   |                               | 38                    | 59  | 7   | 133   | Successful > Unsuccessful |
| L. Cingulate Gyrus & BA32        |                               | -4                    | 9   | 41  | 127   | Successful > Unsuccessful |
| L. Caudate                       |                               | -12                   | -4  | 19  | 103   | Successful > Unsuccessful |
| L. Caudate                       |                               | -17                   | -14 | 24  | 90    | Successful > Unsuccessful |
| R. Superior frontal gyrus & BA10 |                               | 9                     | 62  | 22  | 84    | Successful > Unsuccessful |
| L. Caudate                       |                               | -13                   | 5   | 16  | 61    | Successful > Unsuccessful |
| L. Superior frontal gyrus        |                               | -23                   | 59  | -1  | 56    | Successful > Unsuccessful |
| L. Middle frontal gyrus & BA10   |                               | -25                   | 66  | 6   | 50    | Successful > Unsuccessful |
| R. Superior frontal gyrus & BA10 |                               | 25                    | 54  | 0   | 49    | Successful > Unsuccessful |
| L. Caudate                       |                               | -17                   | -25 | 20  | 49    | Successful > Unsuccessful |
| R. Middle frontal gyrus & BA10   |                               | 44                    | 44  | 12  | 47    | Successful > Unsuccessful |
| R. Cingulate Gyrus & BA32        |                               | 5                     | 27  | 33  | 47    | Successful > Unsuccessful |
| R. Middle frontal gyrus & BA10   |                               | 45                    | 45  | 20  | 40    | Successful > Unsuccessful |

|  |                                  |     |     |    |    |                           |
|--|----------------------------------|-----|-----|----|----|---------------------------|
|  | R. Anterior cingulate & BA10     | 19  | 47  | -2 | 38 | Successful > Unsuccessful |
|  | R. Superior frontal gyrus & BA10 | 26  | 57  | 24 | 33 | Successful > Unsuccessful |
|  | L. Caudate                       | -21 | -32 | 15 | 32 | Successful > Unsuccessful |
|  | L. Middle frontal gyrus          | -26 | 49  | -5 | 30 | Successful > Unsuccessful |
|  | R. Middle frontal gyrus & BA10   | 39  | 46  | 12 | 28 | Successful > Unsuccessful |

BA, Brodmann area; L., left; R., right; SVC, small volume correction.



**Table S9.** Summary of task-related changes in activity associated with the MID-R in healthy controls. All clusters and contrasts are significant at  $p_{\text{CORRECTED}} < 0.05$ .

| Contrast                 | Region                           | Talairach Coordinates |     |     | $K_E/\text{mm}^3$ | Contrast               |
|--------------------------|----------------------------------|-----------------------|-----|-----|-------------------|------------------------|
|                          |                                  | x                     | y   | z   |                   |                        |
| Valence: Prime 1         | L. Putamen†                      | -12                   | 8   | 0   | 1429              | Gain > Loss            |
|                          | R. Caudate†                      | 10                    | 7   | -1  | 1255              | Gain > Loss            |
|                          | R. Dentate †                     | 5                     | -53 | -25 | 937               | Gain > Loss            |
|                          | R. Lingual gyrus †               | 16                    | -62 | 5   | 916               | Gain > Loss            |
|                          | R. Mammillary body †             | 1                     | -14 | -8  | 541               | Gain > Loss            |
|                          | L. Inferior semi-lunar lobule †  | -32                   | -68 | -48 | 371               | Gain > Loss            |
|                          | L. Lingual gyrus †               | -18                   | -65 | 3   | 343               | Gain > Loss            |
|                          | R. Culmen †                      | 14                    | -43 | -6  | 291               | Gain > Loss            |
|                          | R. BA27 †                        | 5                     | -27 | -10 | 260               | Gain > Loss            |
|                          | R. Caudate ‡                     | 8                     | 10  | 0   | 582               | Gain > Loss            |
|                          | L. Putamen ‡                     | -17                   | 10  | -3  | 516               | Gain > Loss            |
|                          | L. Caudate ‡                     | -9                    | 9   | 3   | 495               | Gain > Loss            |
|                          | R. Putamen ‡                     | 15                    | 7   | -4  | 109               | Gain > Loss            |
|                          | L. Caudate ‡                     | -9                    | 1   | 13  | 59                | Gain > Loss            |
|                          | R. Anterior cingulate/BA32 ‡     | -9                    | 36  | 19  | 40                | Gain > Loss            |
|                          | L. Medial frontal gyrus/BA10 ‡   | -3                    | 60  | -5  | 31                | Gain > Loss            |
|                          | R. Medial frontal gyrus/BA10 ‡   | 4                     | 60  | -4  | 28                | Gain > Loss            |
|                          | VTA ‡                            | 0                     | -15 | -7  | 269               | Gain > Loss            |
| Gain Magnitude (Prime 2) | R. Cuneus †                      | 4                     | -81 | 16  | 9747              | Small < Large          |
|                          | L. Thalamus †                    | -1                    | -4  | 11  | 7480              | Small < Large          |
|                          | L. Medial frontal gyrus/BA6 †    | 0                     | 13  | 43  | 2305              | Small < Large          |
|                          | R. Declive †                     | 17                    | -66 | -19 | 2246              | Small < Large          |
|                          | L. Inferior frontal gyrus/BA47 † | -41                   | 20  | 0   | 1983              | Small < Medium         |
|                          | L. Declive †                     | -29                   | -69 | -20 | 1493              | Small < Medium         |
|                          | R. Inferior frontal gyrus/BA47 † | 46                    | 17  | 0   | 1171              | Small < Medium         |
|                          | R. BA47 †                        | 31                    | 24  | -2  | 791               | Small < Medium         |
|                          | L. Lingual gyrus †               | -20                   | -54 | 0   | 420               | Small < Large & Medium |
|                          | R. Caudate ‡                     | 9                     | 8   | 8   | 1273              | Small < Large & Medium |
|                          | L. Caudate ‡                     | -10                   | 5   | 9   | 752               | Small < Large          |
|                          | L. Putamen ‡                     | -17                   | 9   | 2   | 237               | Small < Large & Medium |

|                          |                                  |     |     |    |       |                           |
|--------------------------|----------------------------------|-----|-----|----|-------|---------------------------|
|                          | R. Anterior cingulate/ BA32 ‡    | 4   | 19  | 35 | 132   | Small < Large             |
|                          | L. Anterior cingulate/BA32 ‡     | -4  | 24  | 34 | 126   | Small < Large             |
|                          | L. Anterior cingulate/BA32 ‡     | -4  | 9   | 41 | 118   | Small < Large             |
|                          | R. Putamen ‡                     | 17  | 10  | 2  | 85    | Small < Large             |
|                          | L. Putamen ‡                     | -20 | 4   | 11 | 70    | Small < Large             |
|                          | R. Putamen ‡                     | 30  | -19 | -1 | 60    | Small < Large             |
|                          | R. Caudate ‡                     | 15  | -10 | 19 | 46    | Small < Large & Medium    |
|                          | L. Superior frontal gyrus/BA10 ‡ | -29 | 53  | -3 | 27    | -                         |
| Loss Magnitude (Prime 2) | R. Medial frontal gyrus/BA10 ‡   | 11  | 53  | 12 | 28    | Medium > Large            |
| Outcome                  | L. Caudate †                     | 0   | 10  | 3  | 14457 | Successful > Unsuccessful |
|                          | L. Anterior cingulate & BA32 †   | -5  | 45  | -4 | 781   | Successful > Unsuccessful |
|                          | R. Cingulate gyrus †             | 12  | -10 | 26 | 683   | Successful > Unsuccessful |
|                          | L. Precuneus †                   | -23 | -46 | 33 | 600   | Successful > Unsuccessful |
|                          | R. Putamen ‡                     | 17  | 10  | 0  | 3242  | Successful > Unsuccessful |
|                          | L. Putamen ‡                     | -17 | 11  | 0  | 2674  | Successful > Unsuccessful |
|                          | L. Putamen ‡                     | -28 | -13 | 9  | 312   | Successful > Unsuccessful |
|                          | L. Anterior cingulate/BA32 ‡     | -4  | 46  | -3 | 160   | Successful > Unsuccessful |

BA, Brodmann area; L., left; MID-R, revised monetary incentive delay task; R., right; VTA, ventral tegmental area.

†whole brain.

‡small volume correction.

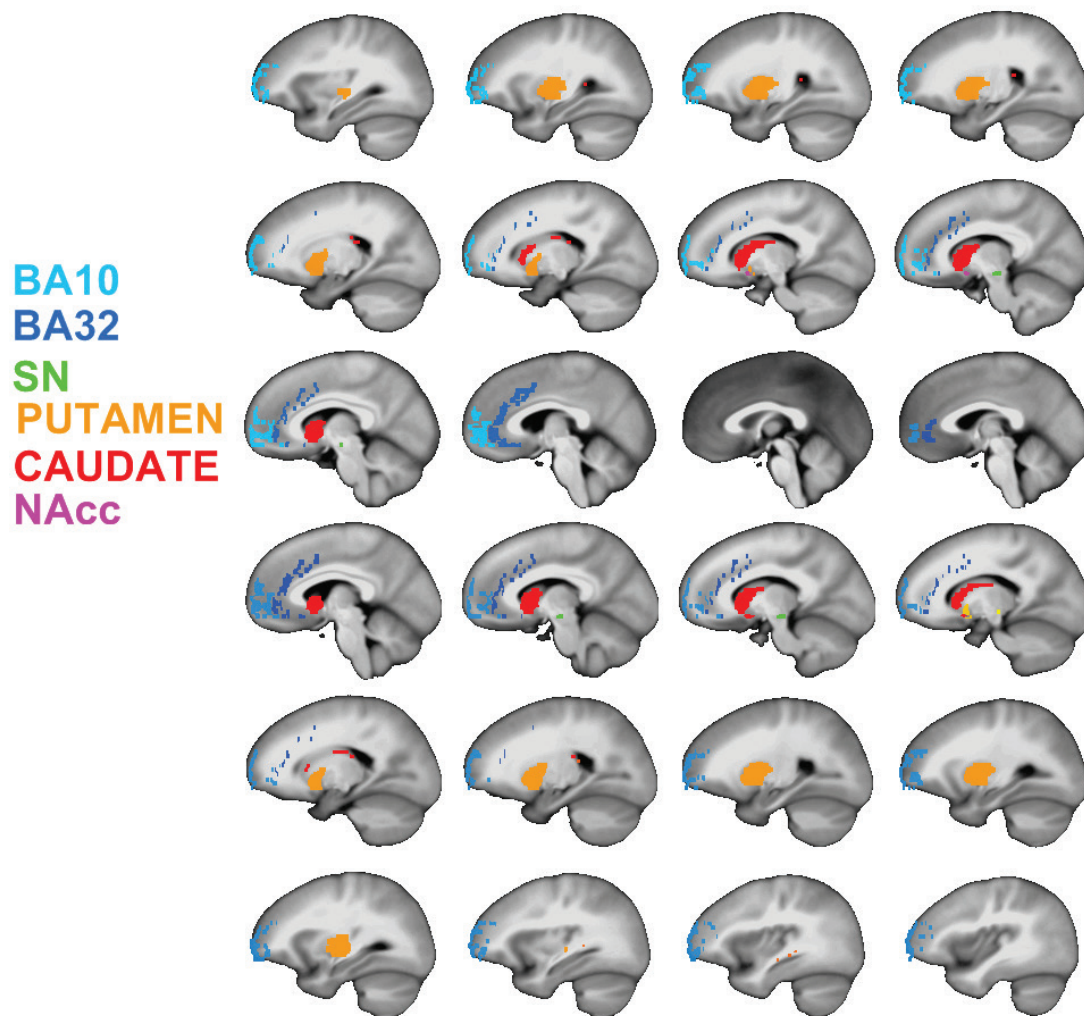

**Figure S1.** A priori anatomical small volume correction masks. BA, Brodmann area; SN, substantia nigra; NAcc, nucleus accumbens.

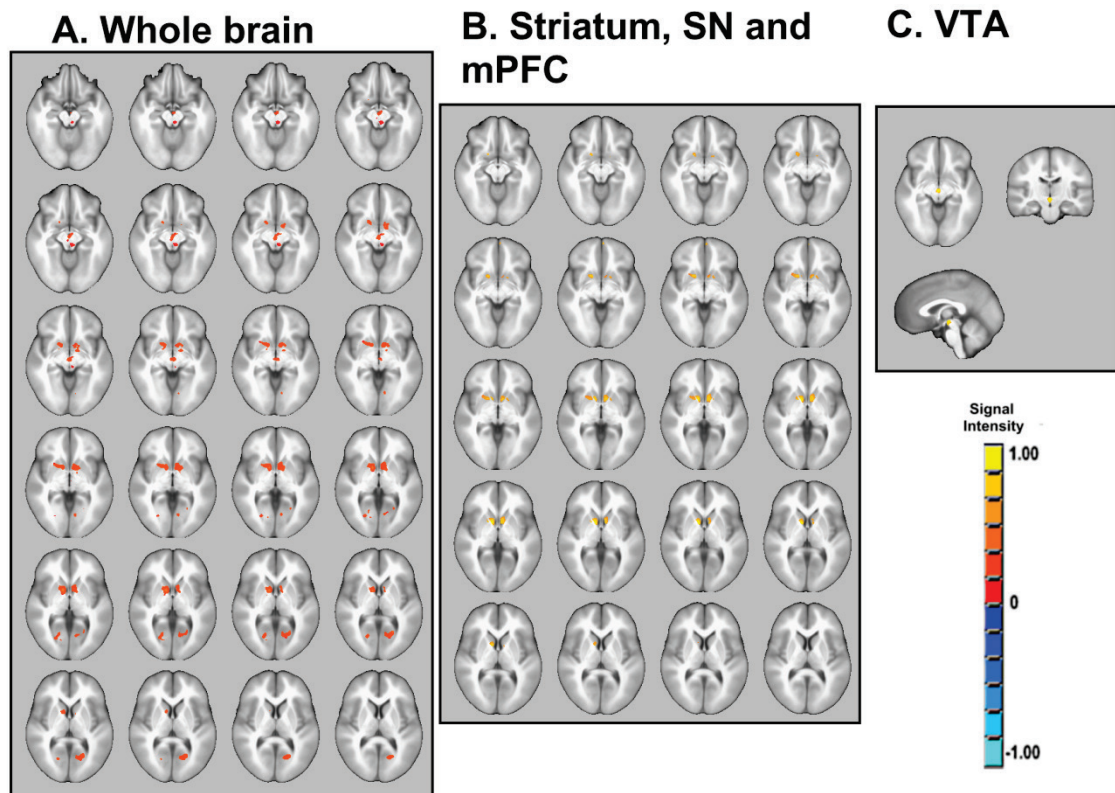

**Figure S2.** Main effect of valence (prime 1) in healthy controls. All clusters are significant at  $p_{\text{CORRECTED}} < 0.05$ . mPFC, medial prefrontal cortex; SN, substantia nigra; VTA, ventral tegmental area.

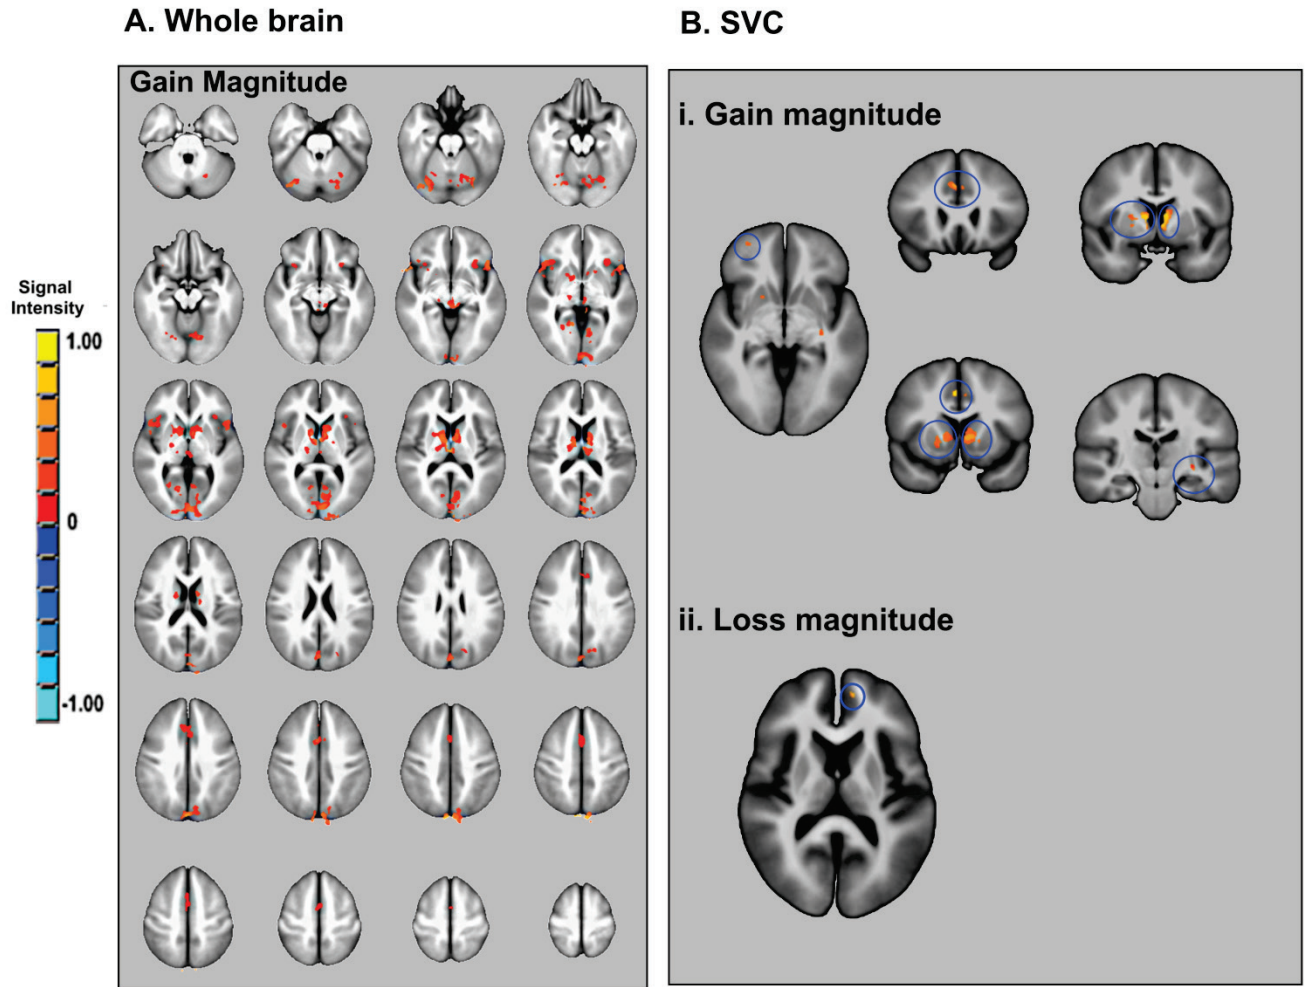

**Figure S3.** Main effect of magnitude (prime 2) in healthy controls. All clusters are significant at  $p_{\text{CORRECTED}} < 0.05$ . SVC, small volume correction.

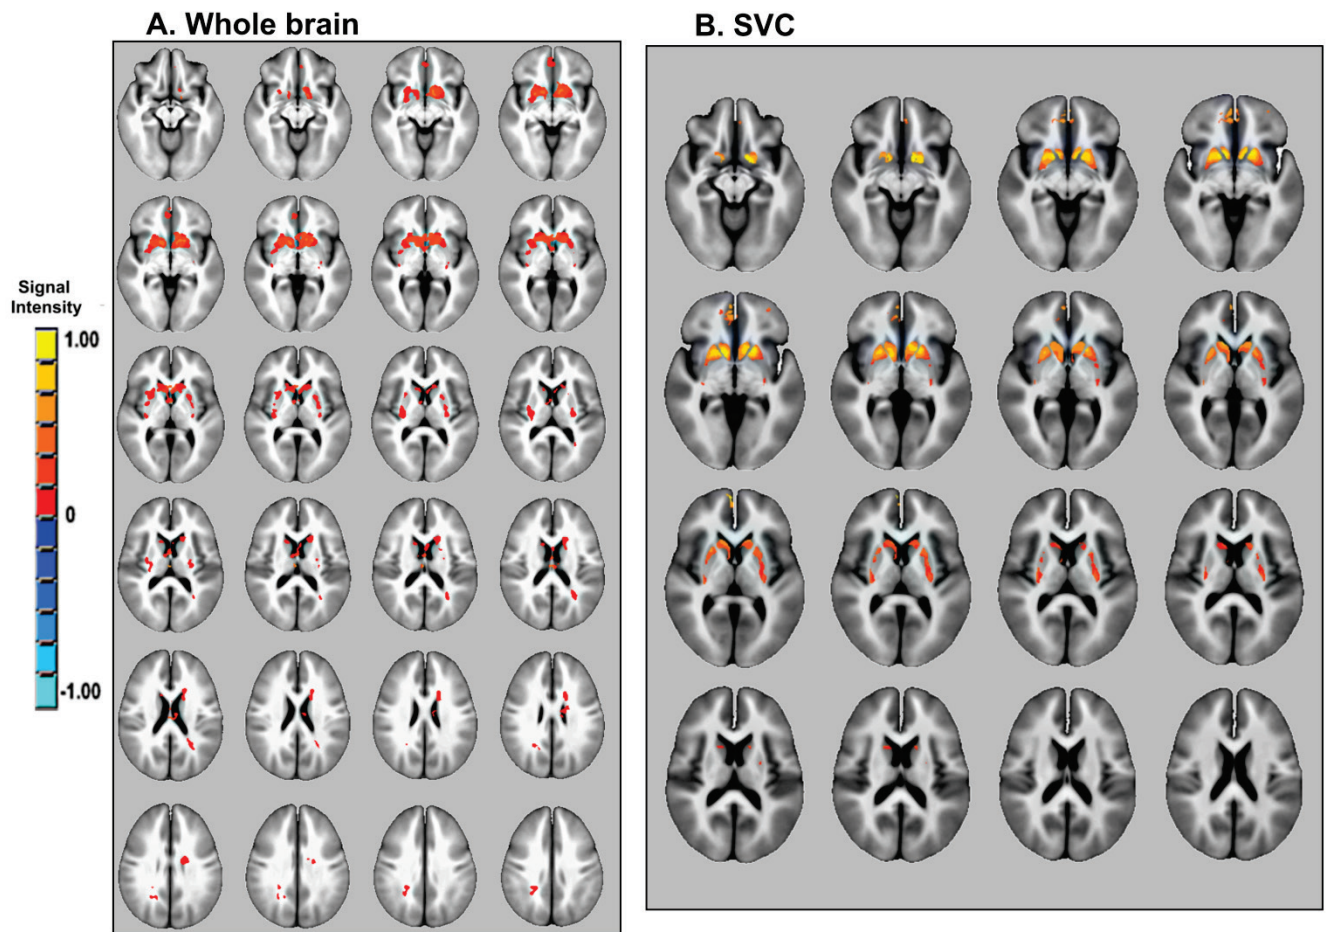

**Figure S4.** Main effect of outcome in healthy controls. All clusters are significant at  $p_{\text{CORRECTED}} < 0.05$ . SVC, small volume correction.

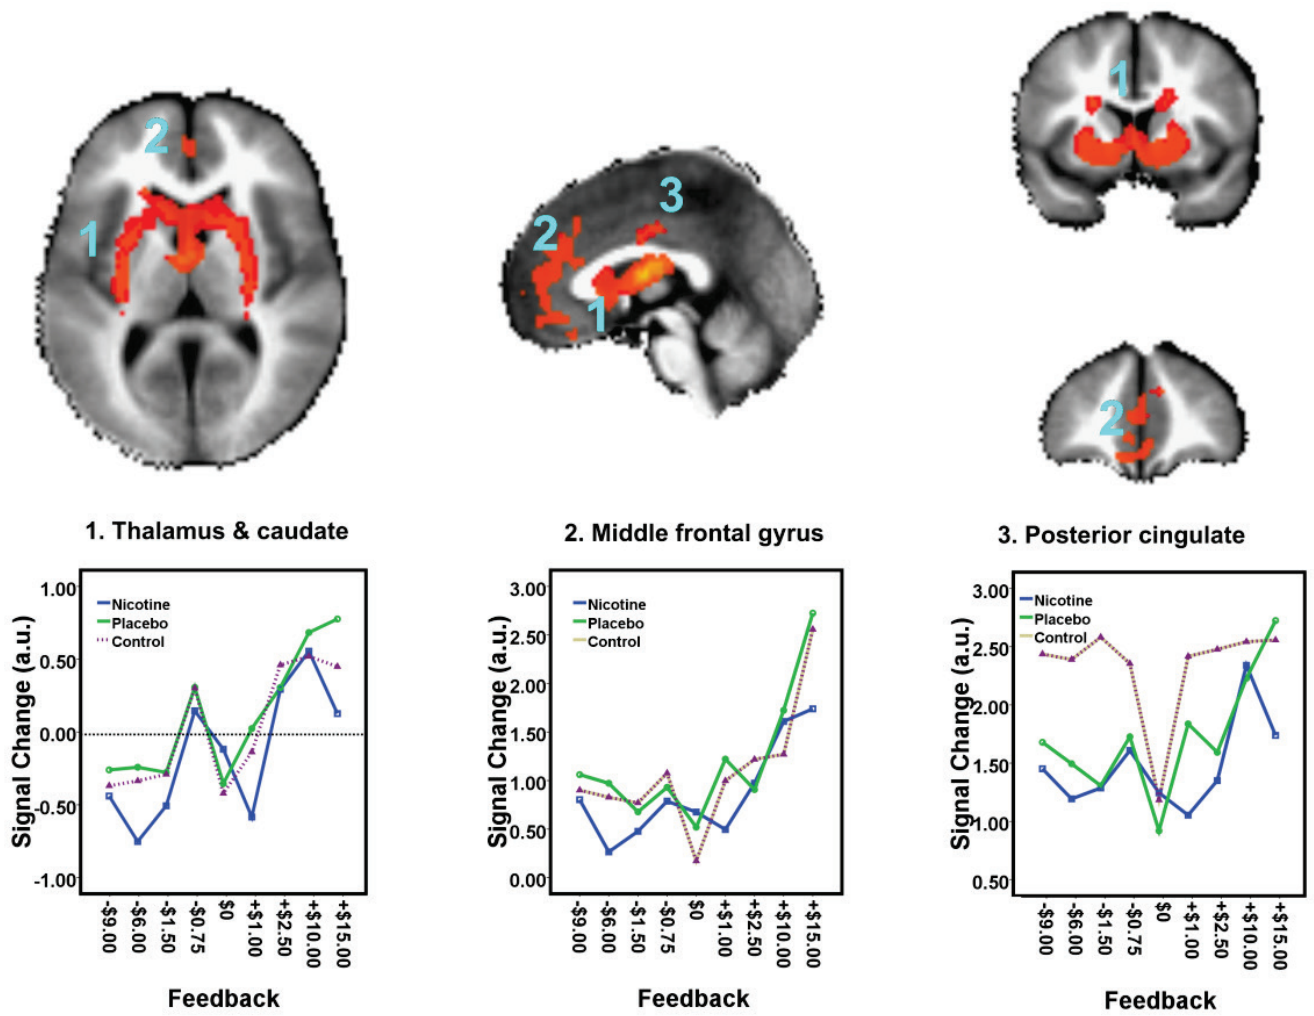

**Figure S5.** Main effect of all levels of feedback ( $n = 9$ ) in whole brain analysis (smokers and controls). All clusters are significant at  $p_{\text{CORRECTED}} < 0.05$ .
